# Supplementary material for: Influences of Ketogenic Diet on Body Fat Percentage, Respiratory Exchange Rate, and Total Cholesterol in Athletes: A Systematic Review and Meta-Analysis
Source: MDPI journal article supplement (doi:10.3390/ijerph18062912), 2021-03-12
Supplement: s1 [file s1]

| Supplementary Table S1. Assessments of the quality and risk of bias |                            |                        |                                        |                                |                         |                     |            |
|---------------------------------------------------------------------|----------------------------|------------------------|----------------------------------------|--------------------------------|-------------------------|---------------------|------------|
| First Author (year)                                                 | Random sequence generation | Allocation concealment | Blinding of participants and personnel | Blinding of outcome assessment | Incomplete outcome data | Selective reporting | Other bias |
| Goedecke, (1999), South Africa                                      | +                          | +                      | ?                                      | ?                              | +                       | ?                   | +          |
| Lambert (2001), United Kingdom                                      | +                          | -                      | -                                      | -                              | +                       | ?                   | +          |
| Zajac, (2014), Australia                                            | +                          | -                      | -                                      | -                              | +                       | ?                   | +          |
| Burke (2017), Australia                                             | +                          | +                      | ?                                      | ?                              | +                       | ?                   | +          |
| Wilson (2017), U.S.A.                                               | +                          | +                      | ?                                      | ?                              | +                       | ?                   | +          |
| Greene (2018), Australia                                            | +                          | -                      | -                                      | -                              | +                       | ?                   | +          |
| Vargas (2018), Spain                                                | +                          | +                      | ?                                      | ?                              | +                       | ?                   | +          |
| Shaw (2019), New Zealand                                            | +                          | -                      | -                                      | ?                              | +                       | ?                   | +          |

+ = Low risk of bias, - = High risk of bias, ? = Unclear risk of bias
